# Supplementary material
Source: publisher site journal article supplement (http://www.degruyter.com/publication/journal_key/BIOL/downloadAsset/BIOL_CFP%20Bioactive%20Compounds%20and%20New%20Metabolites.pdf)
Supplement: Supplementary file 1 [file BIOL_CFP%20Bioactive%20Compounds%20and%20New%20Metabolites.pdf]

# NEW APPROACH TO OBTAIN BIOACTIVE COMPOUNDS AND NEW METABOLITES FROM AGRO-INDUSTRIAL BY-PRODUCTS

## GUEST EDITORS

---

**Dr. Przemysław Łukasz Kowalczewski, PhD**

Institute of Food Technology of Plant Origin  
Poznań University of Life Sciences, Poznań, Poland  
[przemyslaw.kowalczewski@puls.edu.pl](mailto:przemyslaw.kowalczewski@puls.edu.pl)

**Dr. Marek Kieliszek, PhD DSc**

Department of Food Biotechnology and Microbiology, Institute of Food Sciences,  
Warsaw University of Life Sciences (WULS-SGGW), Warsaw, Poland  
[marek\\_kieliszek@sggw.pl](mailto:marek_kieliszek@sggw.pl)

## DESCRIPTION

---

Every day the agri-food industry generates enormous amounts of waste, which is a severe problem in the short-term global food system. As food waste increases to around 126 million tonnes by 2020, the slogan 'from waste to resources' is promoted to reintroduce food waste into the economy as new raw materials, thus increasing the security of supply. Waste management, therefore, plays a key role. The industrial waste can be used both as a source of bioactive compounds (nutritional, functional, antimicrobial, anti-cancerogenic etc.) for food production, but also as a raw material for further biotechnological conversion to industrially useful metabolites.

We welcome both original research and review articles focused on current biotechnology, food technology and human nutrition, especially modern methods of production and testing of new bioactive compounds and metabolites obtained from agricultural waste. Papers regarding the latest methods of reduction of waste generation, its recovery and reuse will also be a valuable contribution to this issue.

The topics of this special issue include, but are not limited to:

- ▶ Alternative sources of nutrients and bioactive compounds from by-products
- ▶ Biosynthesis of industrially important metabolites (such as sorbents, enzymes, polymers) from a burdensome agricultural waste
- ▶ Biotechnological and nanotechnological methods in food technology
- ▶ Environmental impact of recycling
- ▶ Isolation and characterization of bioactive compounds from by-products
- ▶ Reduction of waste generation, its recovery and reuse
- ▶ The large-scale production of yeast and bacteria biomass rich in individual metabolites
- ▶ The possibility of application of industrial waste products for the biosynthesis of functional polysaccharides of the cell wall
- ▶ The production of yeast and bacteria biomass by utilizing the waste products originating from various industries
- ▶ Waste management of the agri-food industry

## HOW TO SUBMIT

---

Before submission authors should carefully read the Instruction for Authors:

[https://www.degruyter.com/view/supplement/s23915412\\_Instruction\\_for\\_Authors.pdf](https://www.degruyter.com/view/supplement/s23915412_Instruction_for_Authors.pdf)

All submissions to the Special Issue must be made electronically via online submission system Editorial Manager:

<https://www.editorialmanager.com/openbiol>

All manuscripts will undergo the standard peer-review process (single blind, at least two independent reviewers). When entering your submission via online submission system please choose the option “**SI on Reuse of Agro-Industrial By-Products**”.

Submission of a manuscript implies that the work described has not been published before and it is not under consideration for publication anywhere else.

The deadline for submissions is **December 31, 2020**, but individual papers will be reviewed and published online on an ongoing basis.

Contributors to the Special Issue will benefit from:

- ▶ **indexation in Web of Science (IF 0.504), SCOPUS**
- ▶ **20% discount on Article Processing Charges**
- ▶ quick and constructive peer review provided by experts in the field
- ▶ no space constraints
- ▶ convenient, web-based paper submission and tracking system – Editorial Manager
- ▶ quick online publication upon completing the publishing process (continuous publication model)
- ▶ better visibility due to Open Access
- ▶ long-term preservation of the content (articles archived in Portico)
- ▶ extensive post-publication promotion for selected papers

In case of any questions please contact **Dr. Irmina Fortunato** (Managing Editor of Open Life Sciences; [Irmina.Fortunato@degruyter.com](mailto:Irmina.Fortunato@degruyter.com)).
